# Supplementary material
Source: publisher figshare collection journal article supplement (https://plos.figshare.com/articles/dataset/_/729033)
Supplement: Supplementary file [file 1]

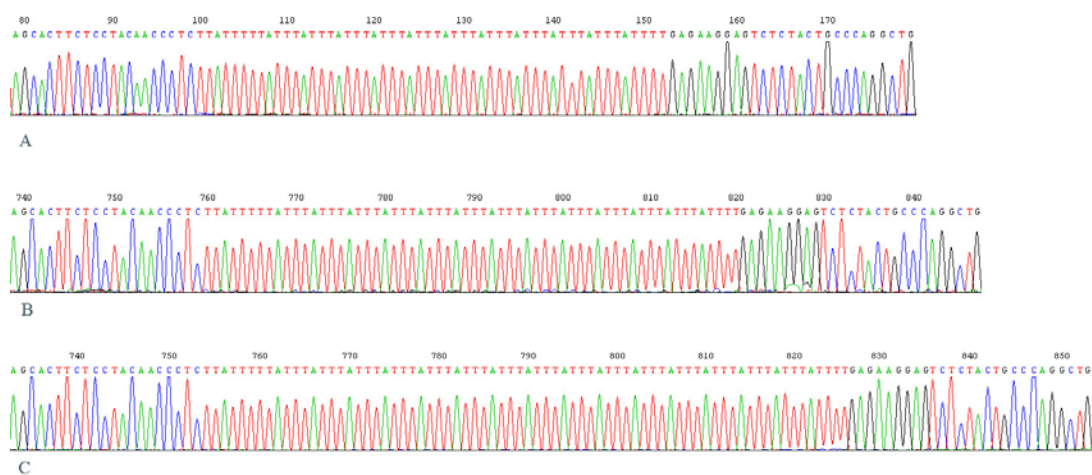

Fig S1. Sequences of allele 11, 13 and 16 at the locus DXS6854 (A: 11 ; B:13; C: 16 )

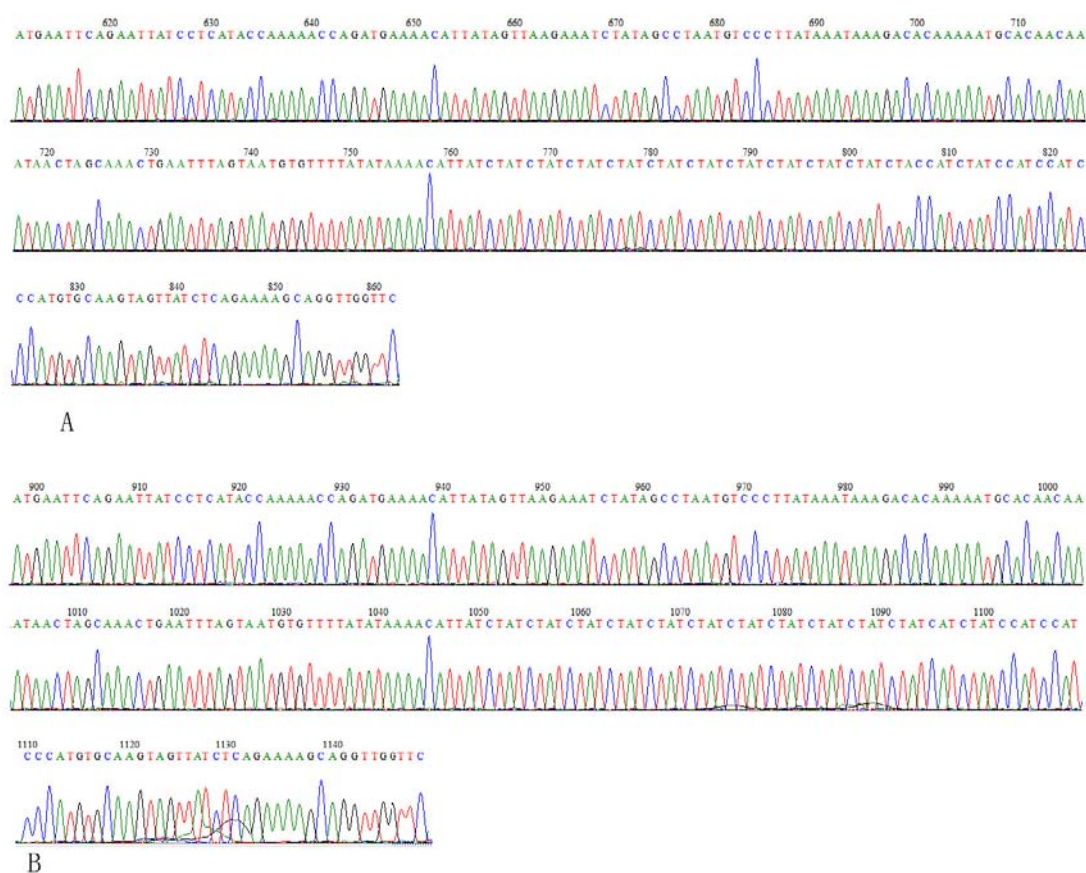

Fig S2. Sequences of allele 12 at the locus DXS6799

A: 12  $P_{F25}$ -N<sub>125</sub>-[TATC]<sub>11</sub>-TACC-N<sub>34</sub>-P<sub>R20</sub>

B: 12a  $P_{F25}$ -N<sub>125</sub>-[TATC]<sub>12</sub>-N<sub>34</sub>-P<sub>R20</sub>

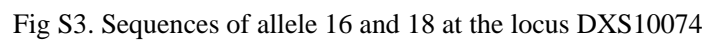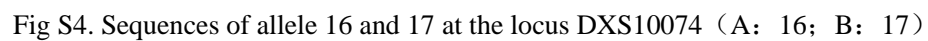

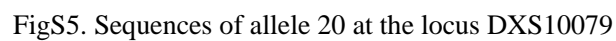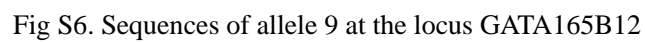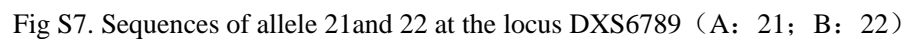













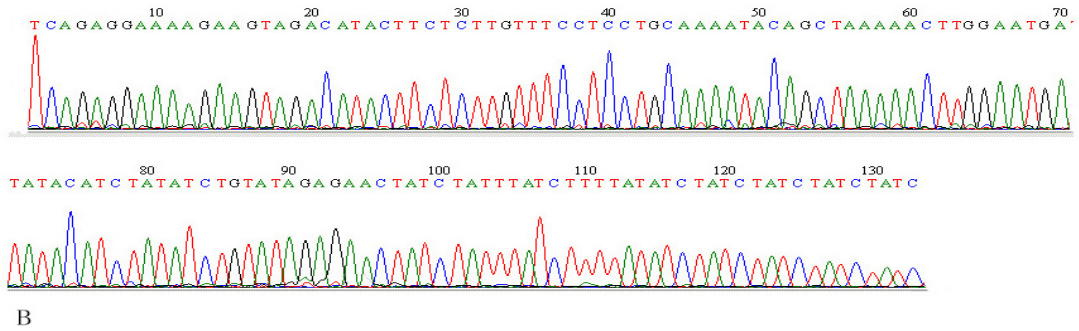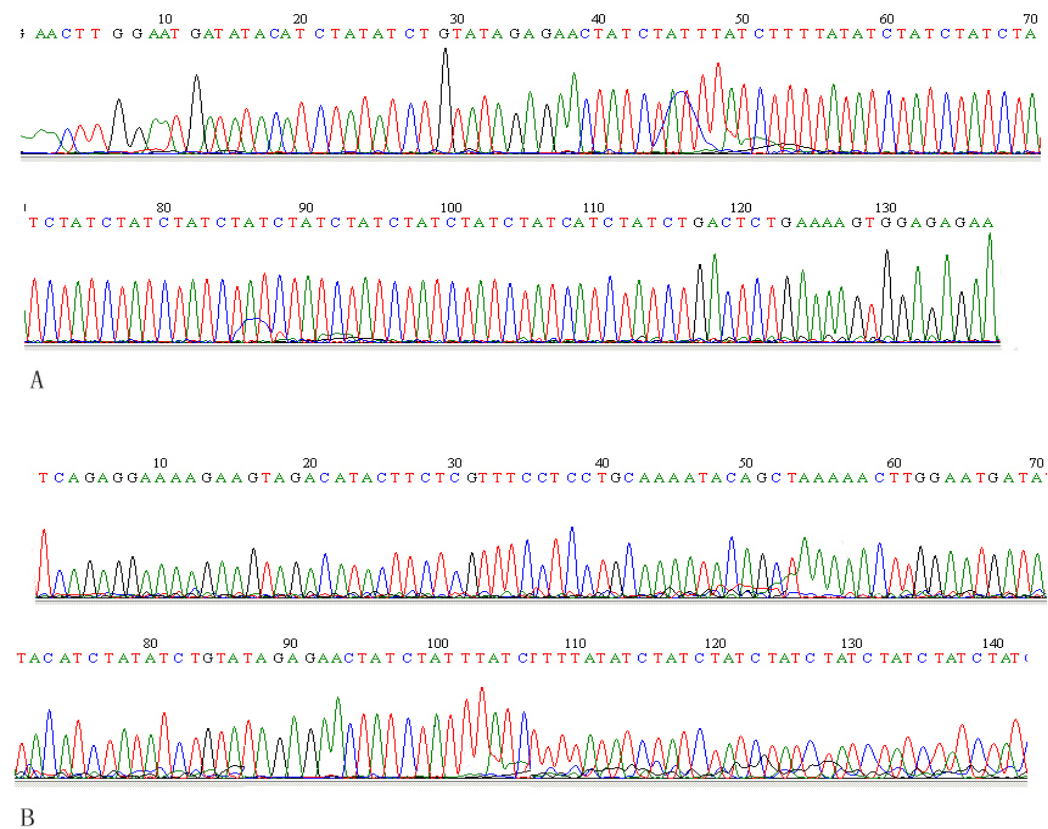

Fig S23. Sequences of allele 14.3 at DXS981 (A: forward, B: reverse)





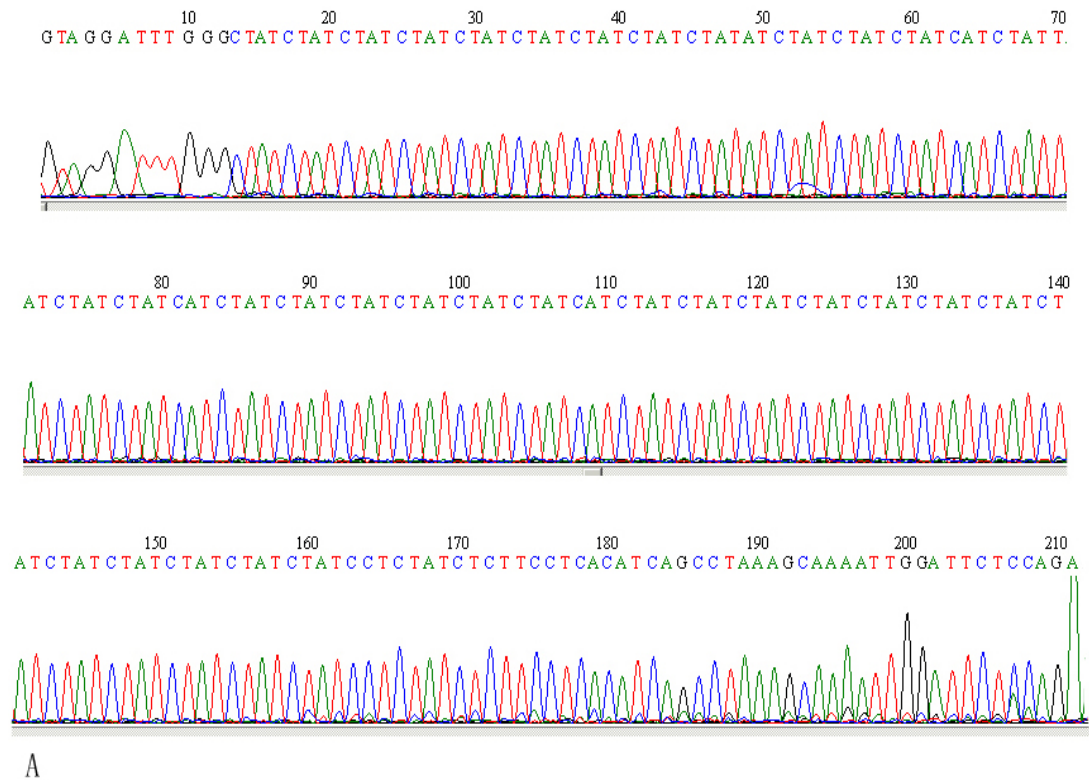

A

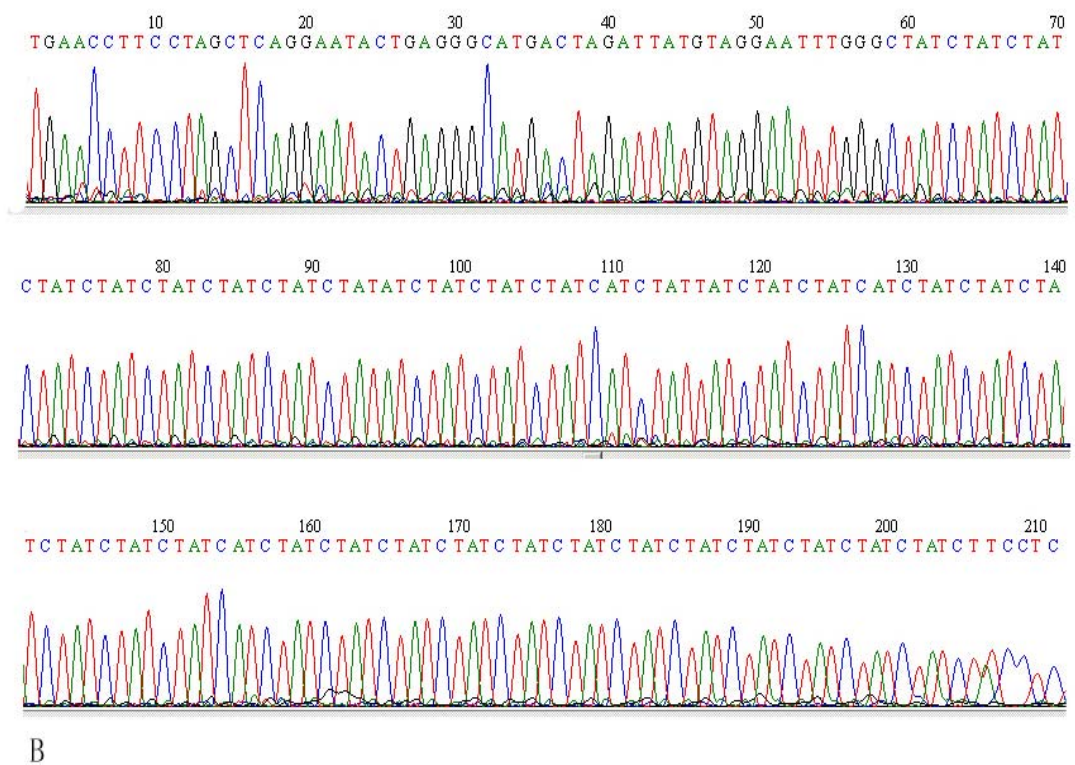

B

Fig S25. Sequences of allele 32.1 at the locus DXS6809 (A: forward, B: reverse)
